# Supplementary material for: Plasma Metabolomic Signatures in Patients with Multidrug-Resistant Bacterial Sepsis
Source: Research Square preprint supplement (doi:10.21203/rs.3.rs-6281031/v1), 2025-04-02
Supplement: Supplementary file 1 [file e498ff095aaf0af66e0775b2.docx]

**Supplemental materials**

**Plasma Metabolomic Signatures in Patients with Multidrug-Resistant Bacterial Sepsis**

**Table S1.** Pilot study in plasma metabolomes between MDR and susceptible patients.

**Table S2.** Permutation test and VIP analysis of metabolites between susceptible G- and MDR G- bacterial infection in discovery set.

**Table S3.** The plasma metabolic profiles in G- infection patients in validation set.

**Table S4.** The random permutation test result of the G- multi-analyte model of discovery and validation sets.

**Table S5.** Permutation test and VIP analysis of metabolites between susceptible G+ and MDR G+ bacterial infection in discovery set.

**Table S6.** The plasma metabolic profiles in G+ infection patients in validation set.

**Table S7.** The random permutation test result of the G- multi-analyte model of discovery and validation sets.


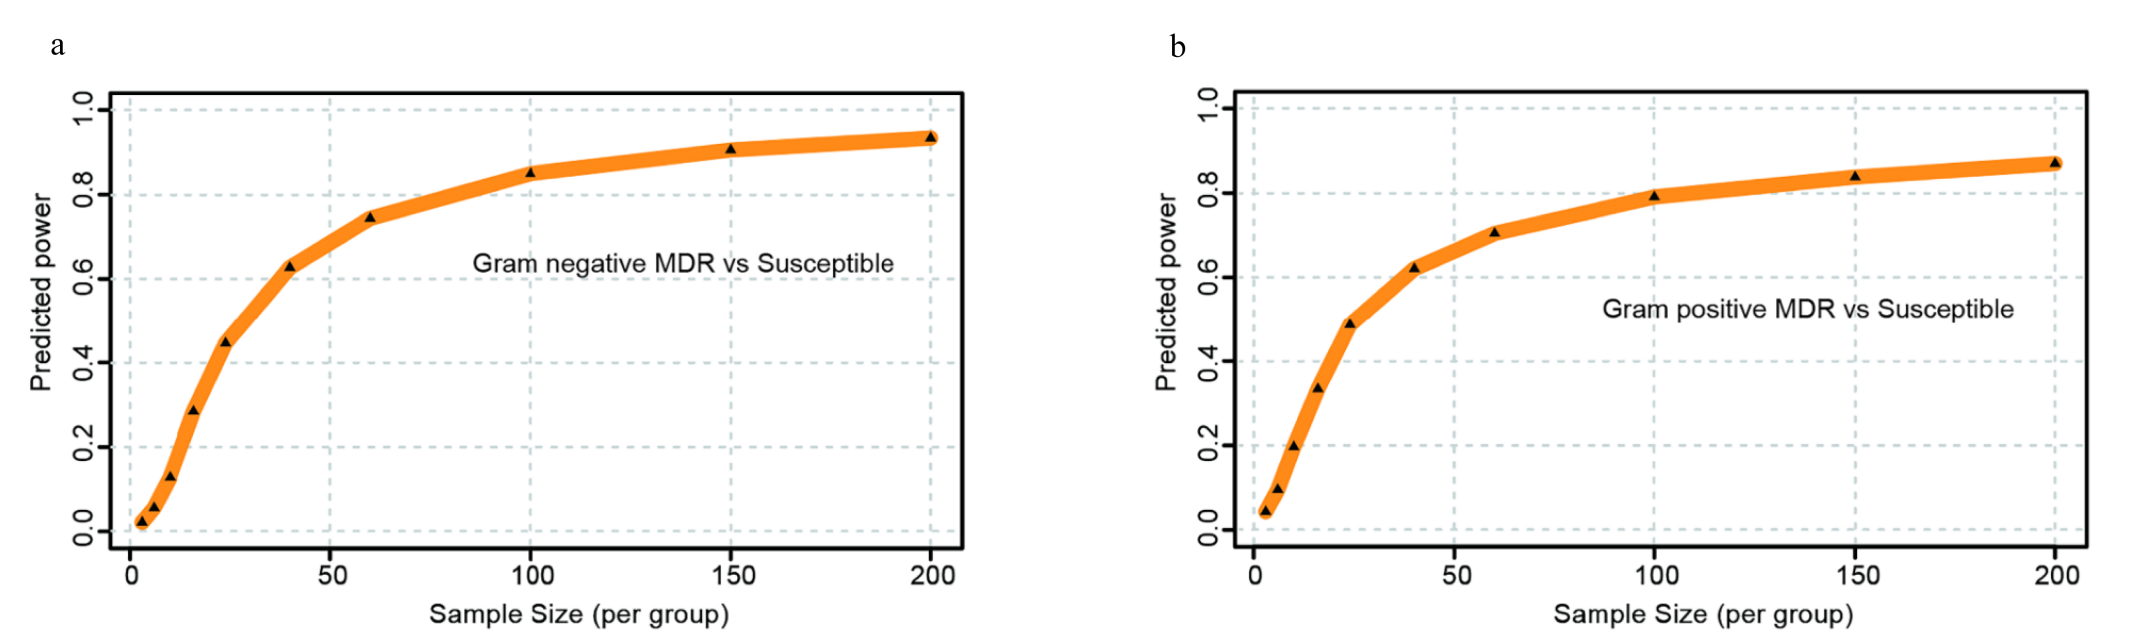


**Figure S1.** **Pilot study in plasma metabolomes between MDR and susceptible patients.** (a) There have > 80% power to detect true discriminating features using about 80 subjects for gram negative infection, and (b) 95 subjects for gram positive infection.


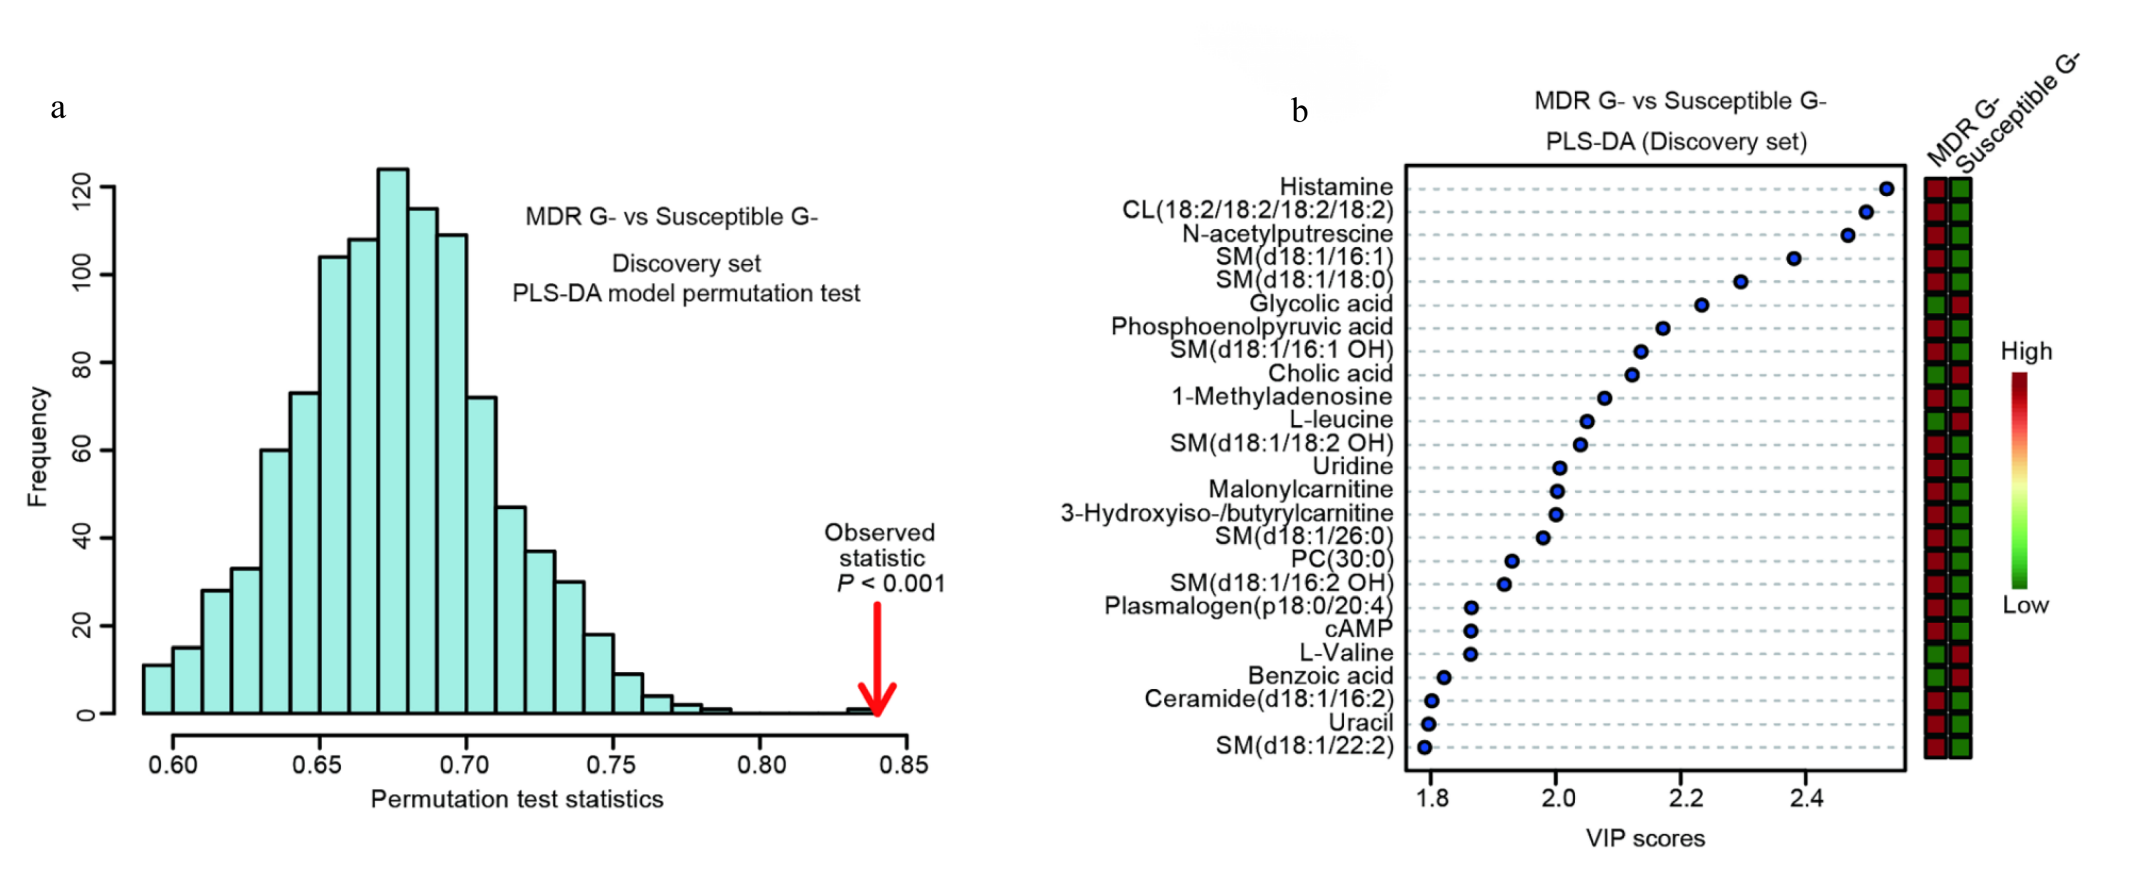


**Figure S2.** **Permutation test and VIP analysis of metabolites between susceptible G- and MDR G- bacterial infection in discovery set.** (a) Permutation test result. (b) VIP analysis result.


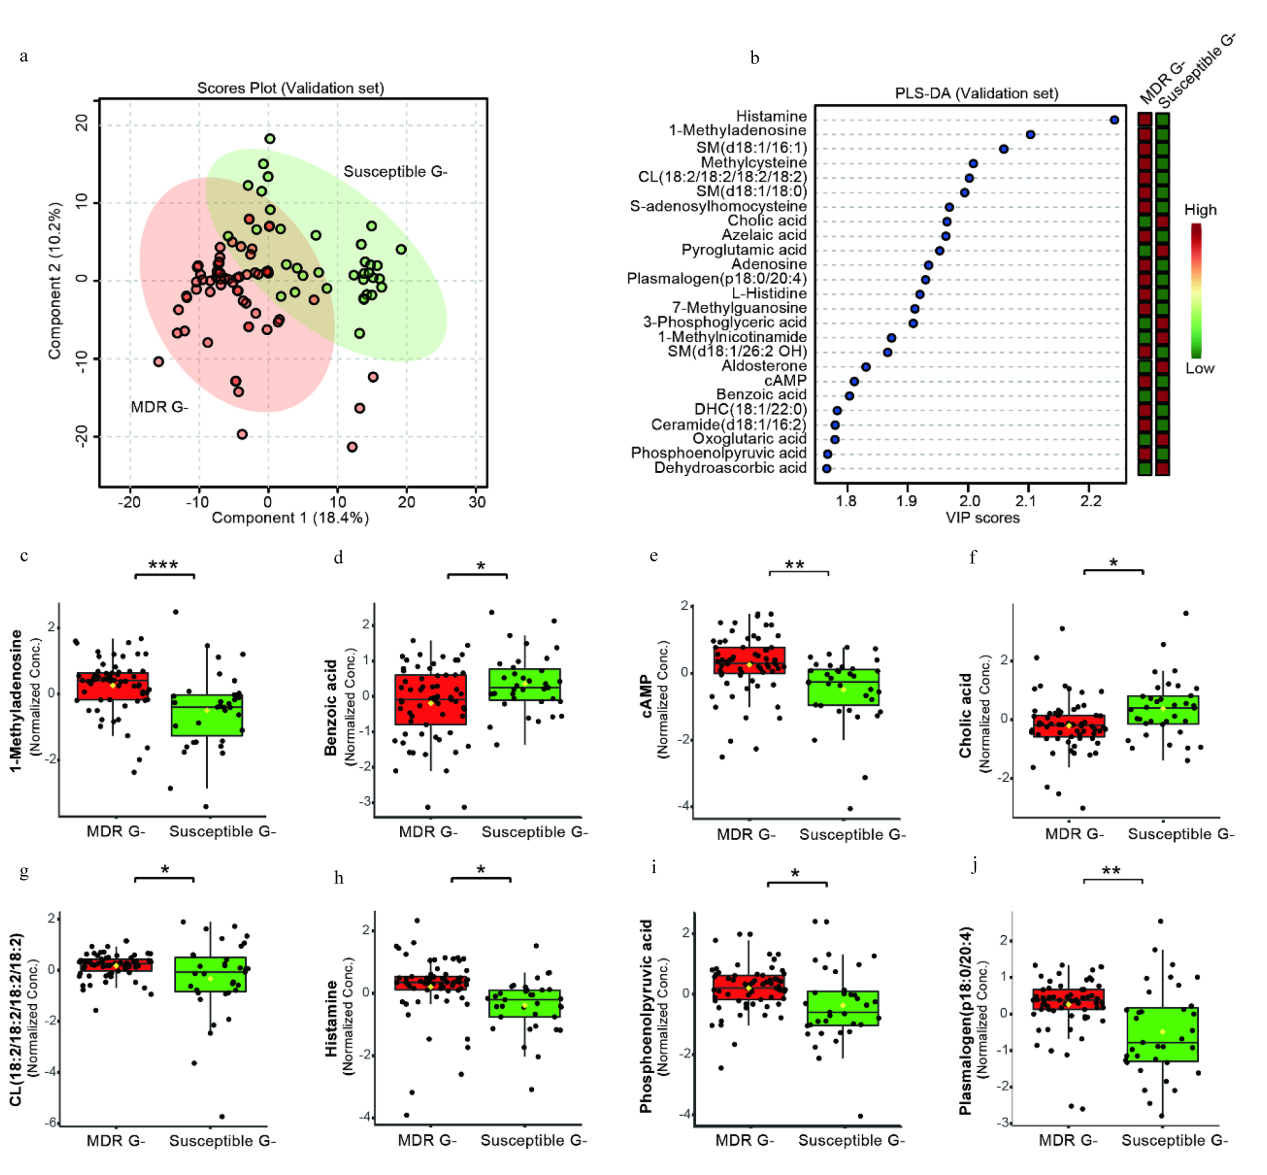


**Figure S3.** **The plasma metabolic profiles in G- infection patients in validation set.** (a) The 2-D PLS-DA plot. (b) VIP analysis result. (c-j) 8 metabolites of G- multi-analyte model.


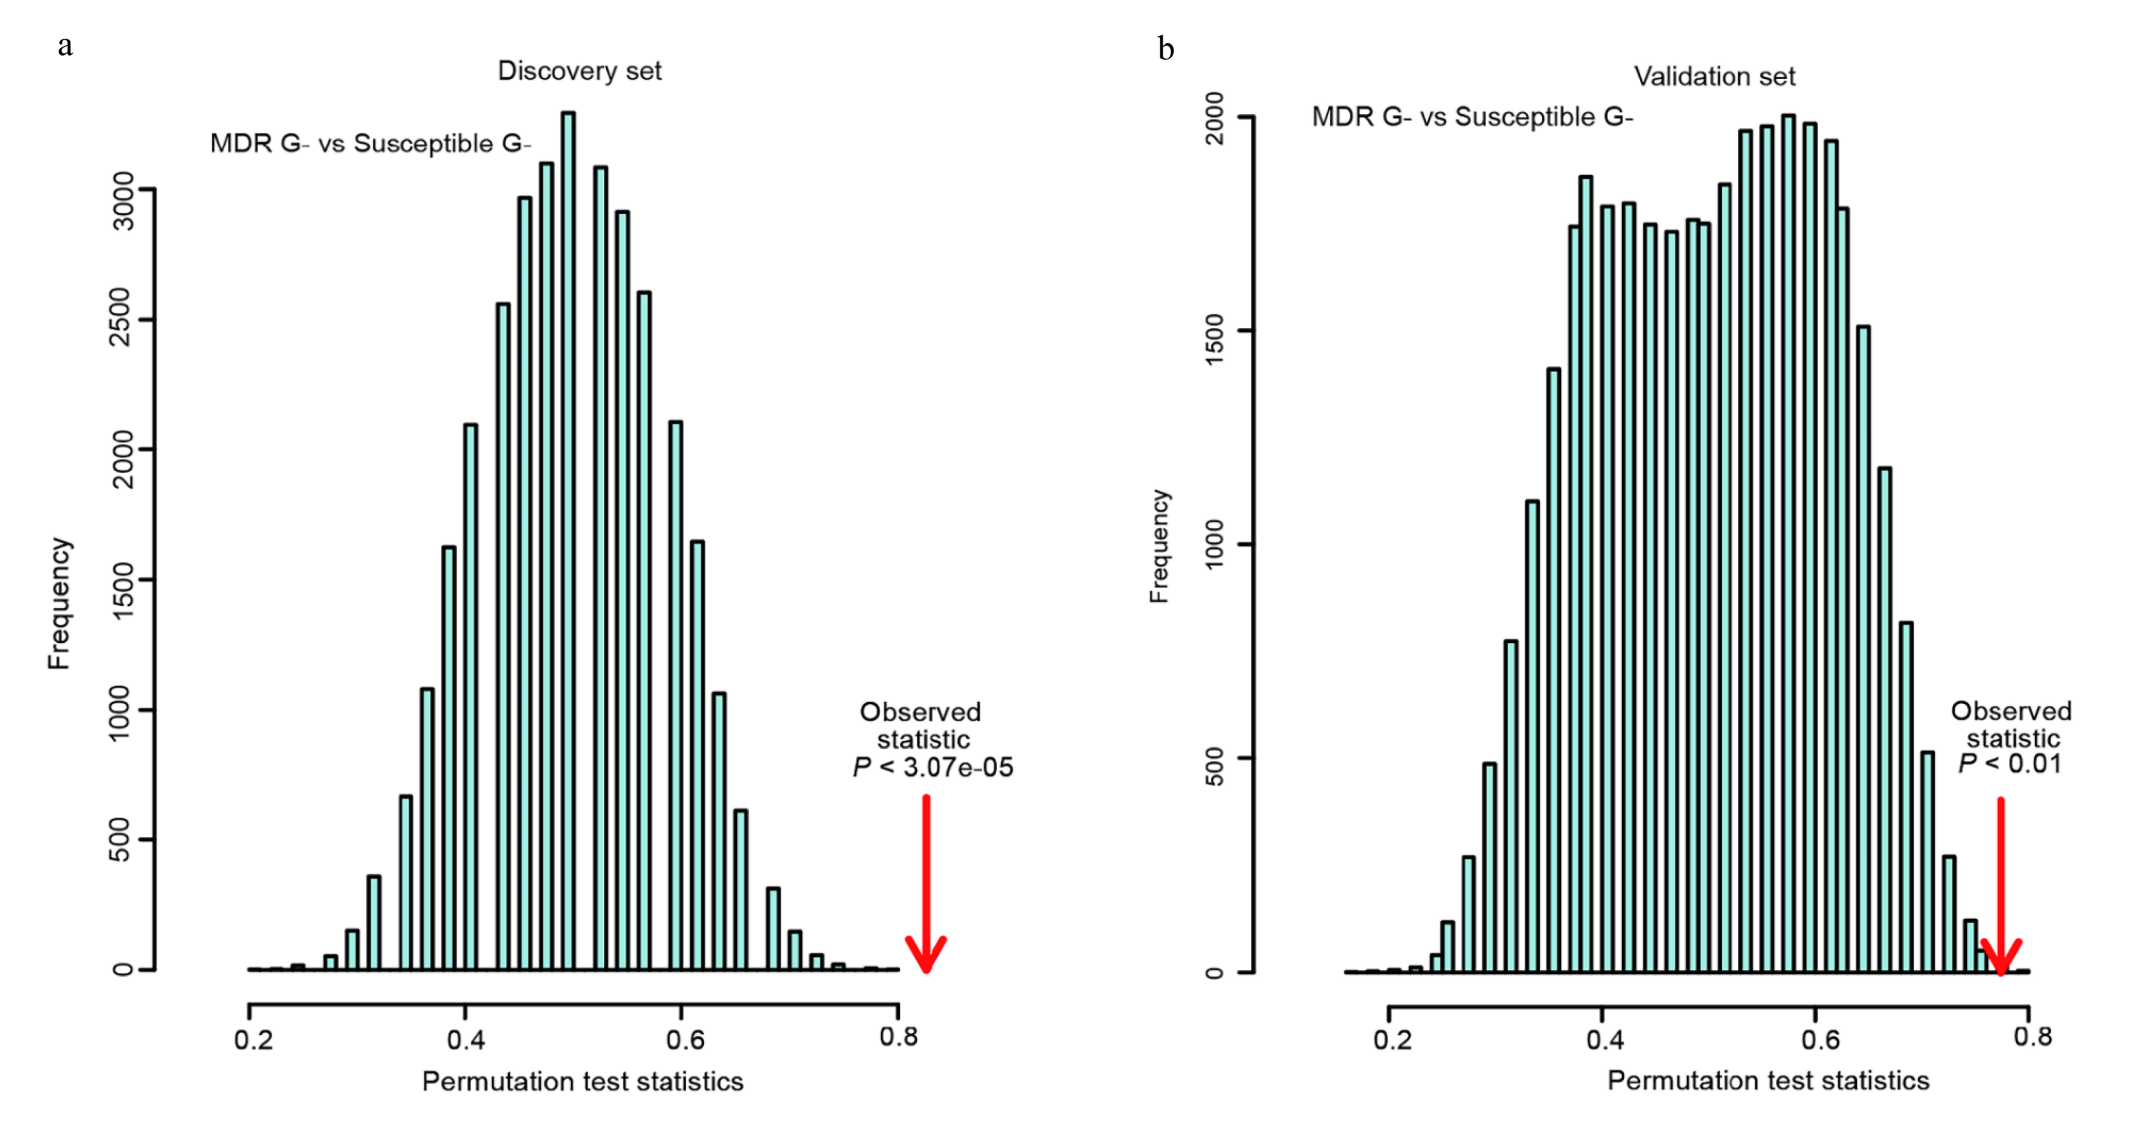


**Figure S4. The random permutation test result of the G- multi-analyte model of discovery and validation sets.** (a) Discovery set. (b) Validation set.


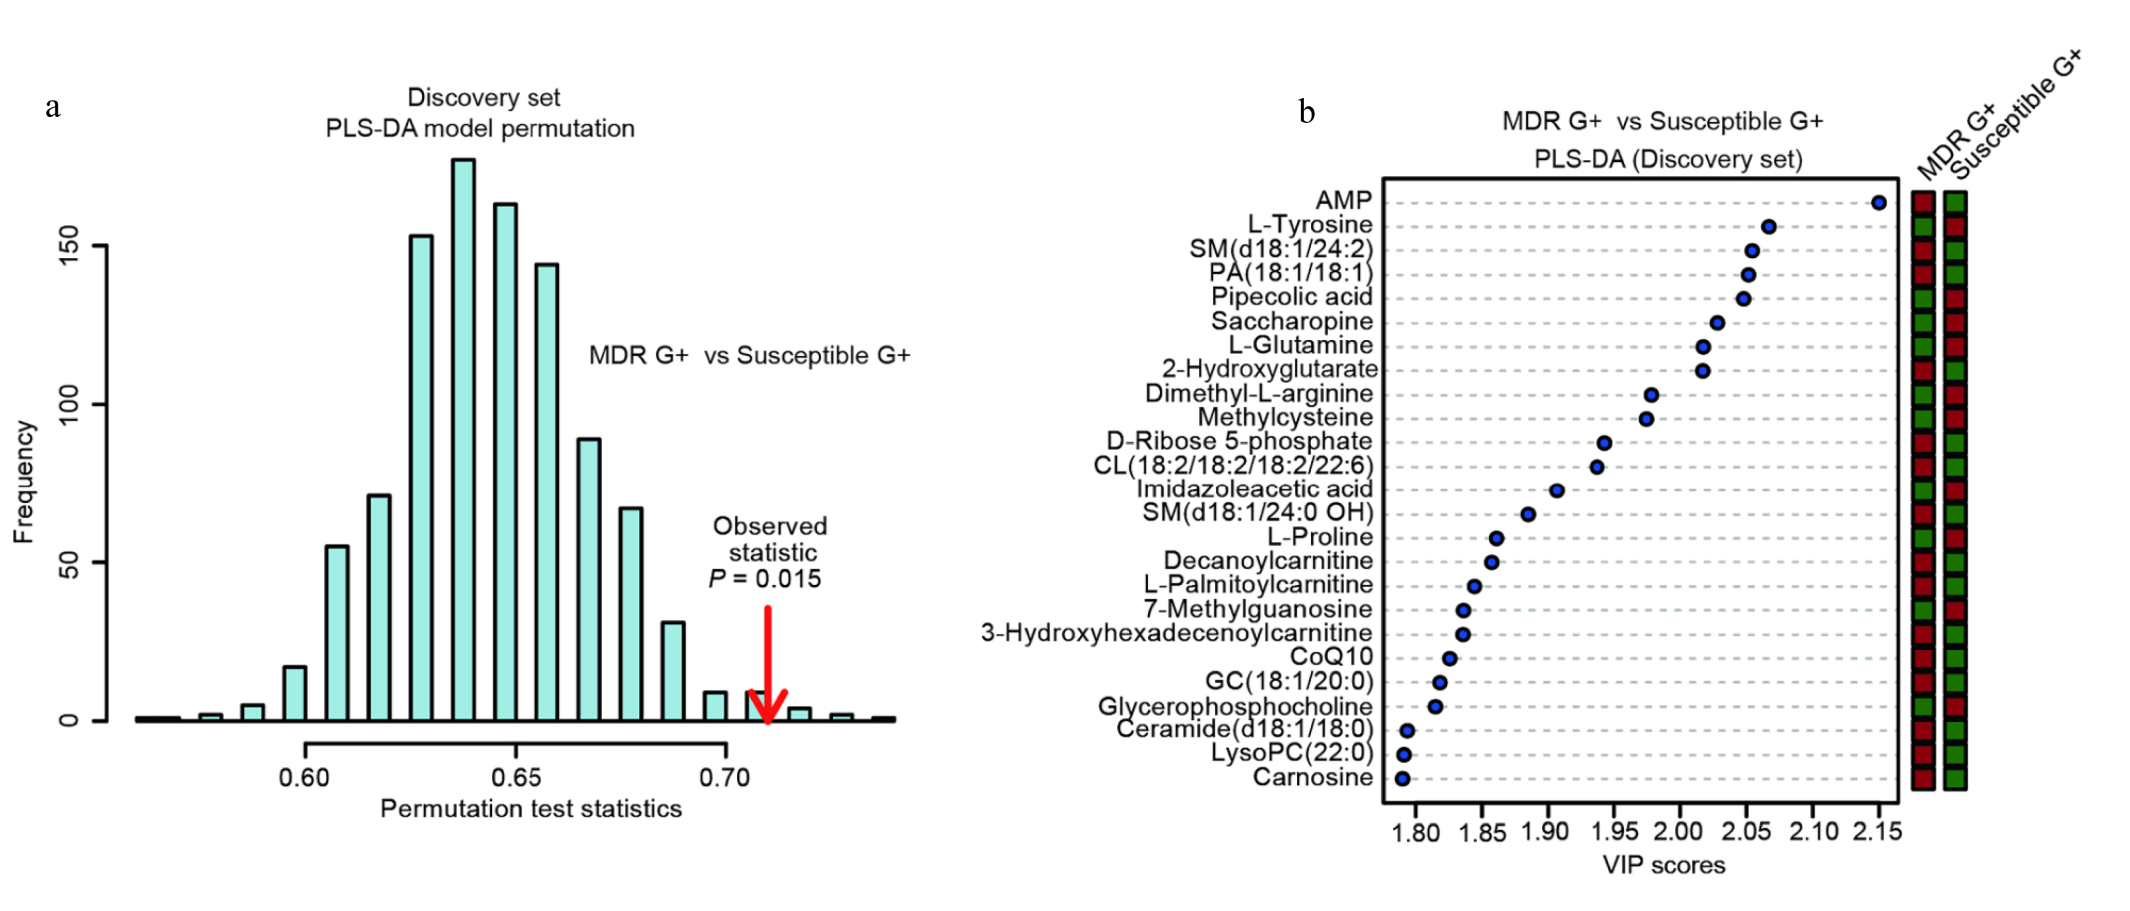


**Figure S5.** **Permutation test and VIP analysis of metabolites between susceptible G+ and MDR G+ bacterial infection in discovery set.** (a) Permutation test result. (b) VIP analysis result.


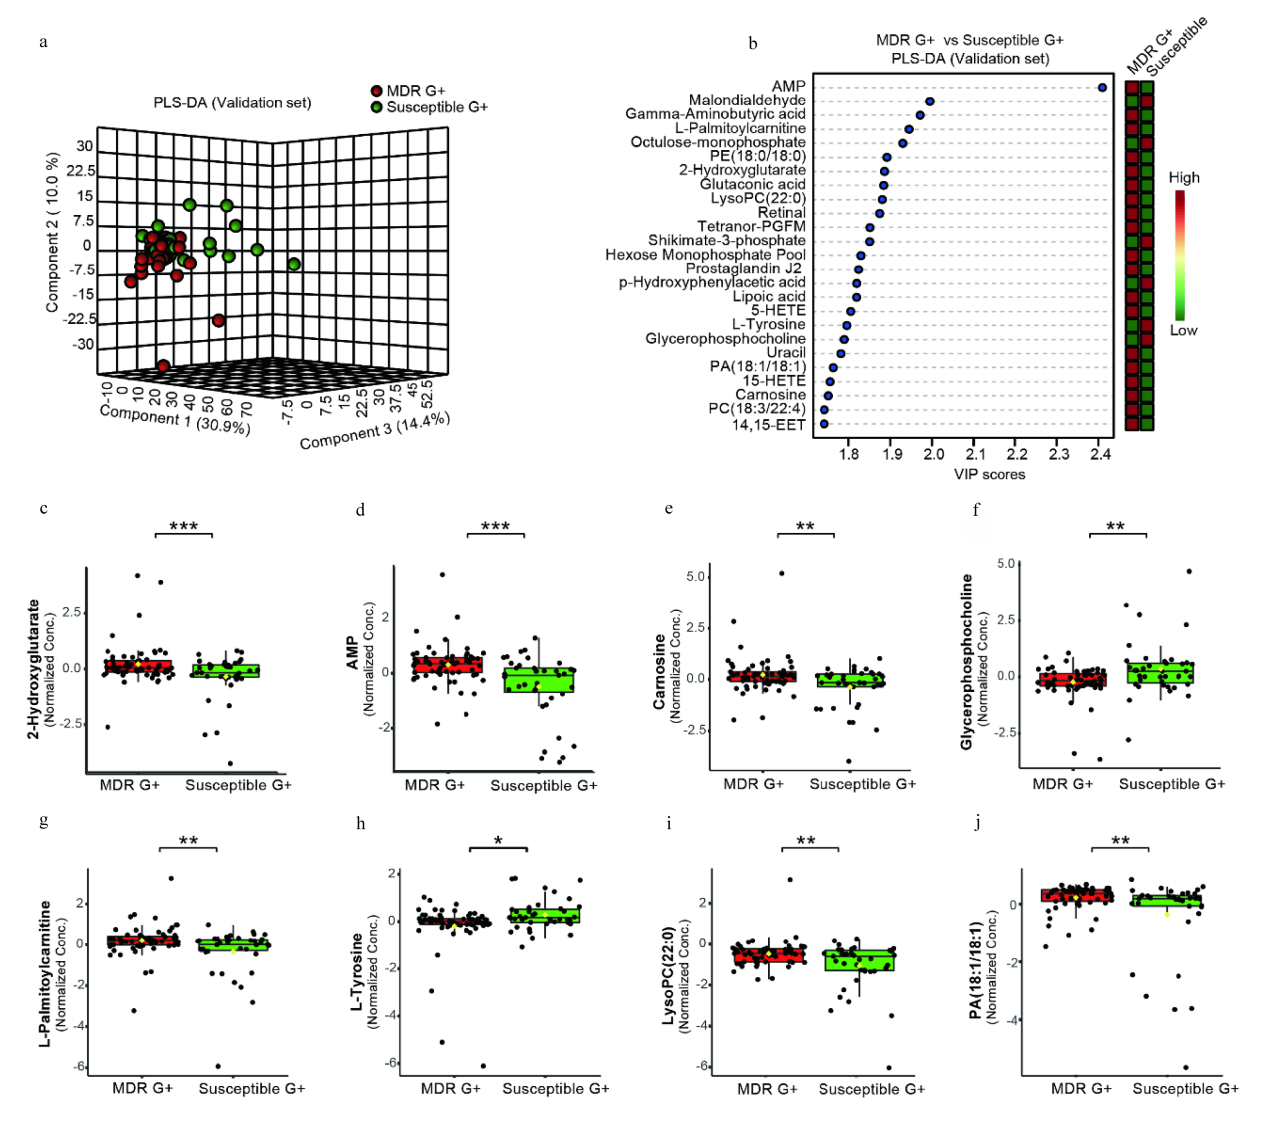


**Figure S6.** **The plasma metabolic profiles in G+ infection patients in validation set.** (a) The 3-D PLS-DA plot. (b) VIP analysis result. (c-j) 8 metabolites of G+ multi-analyte model.


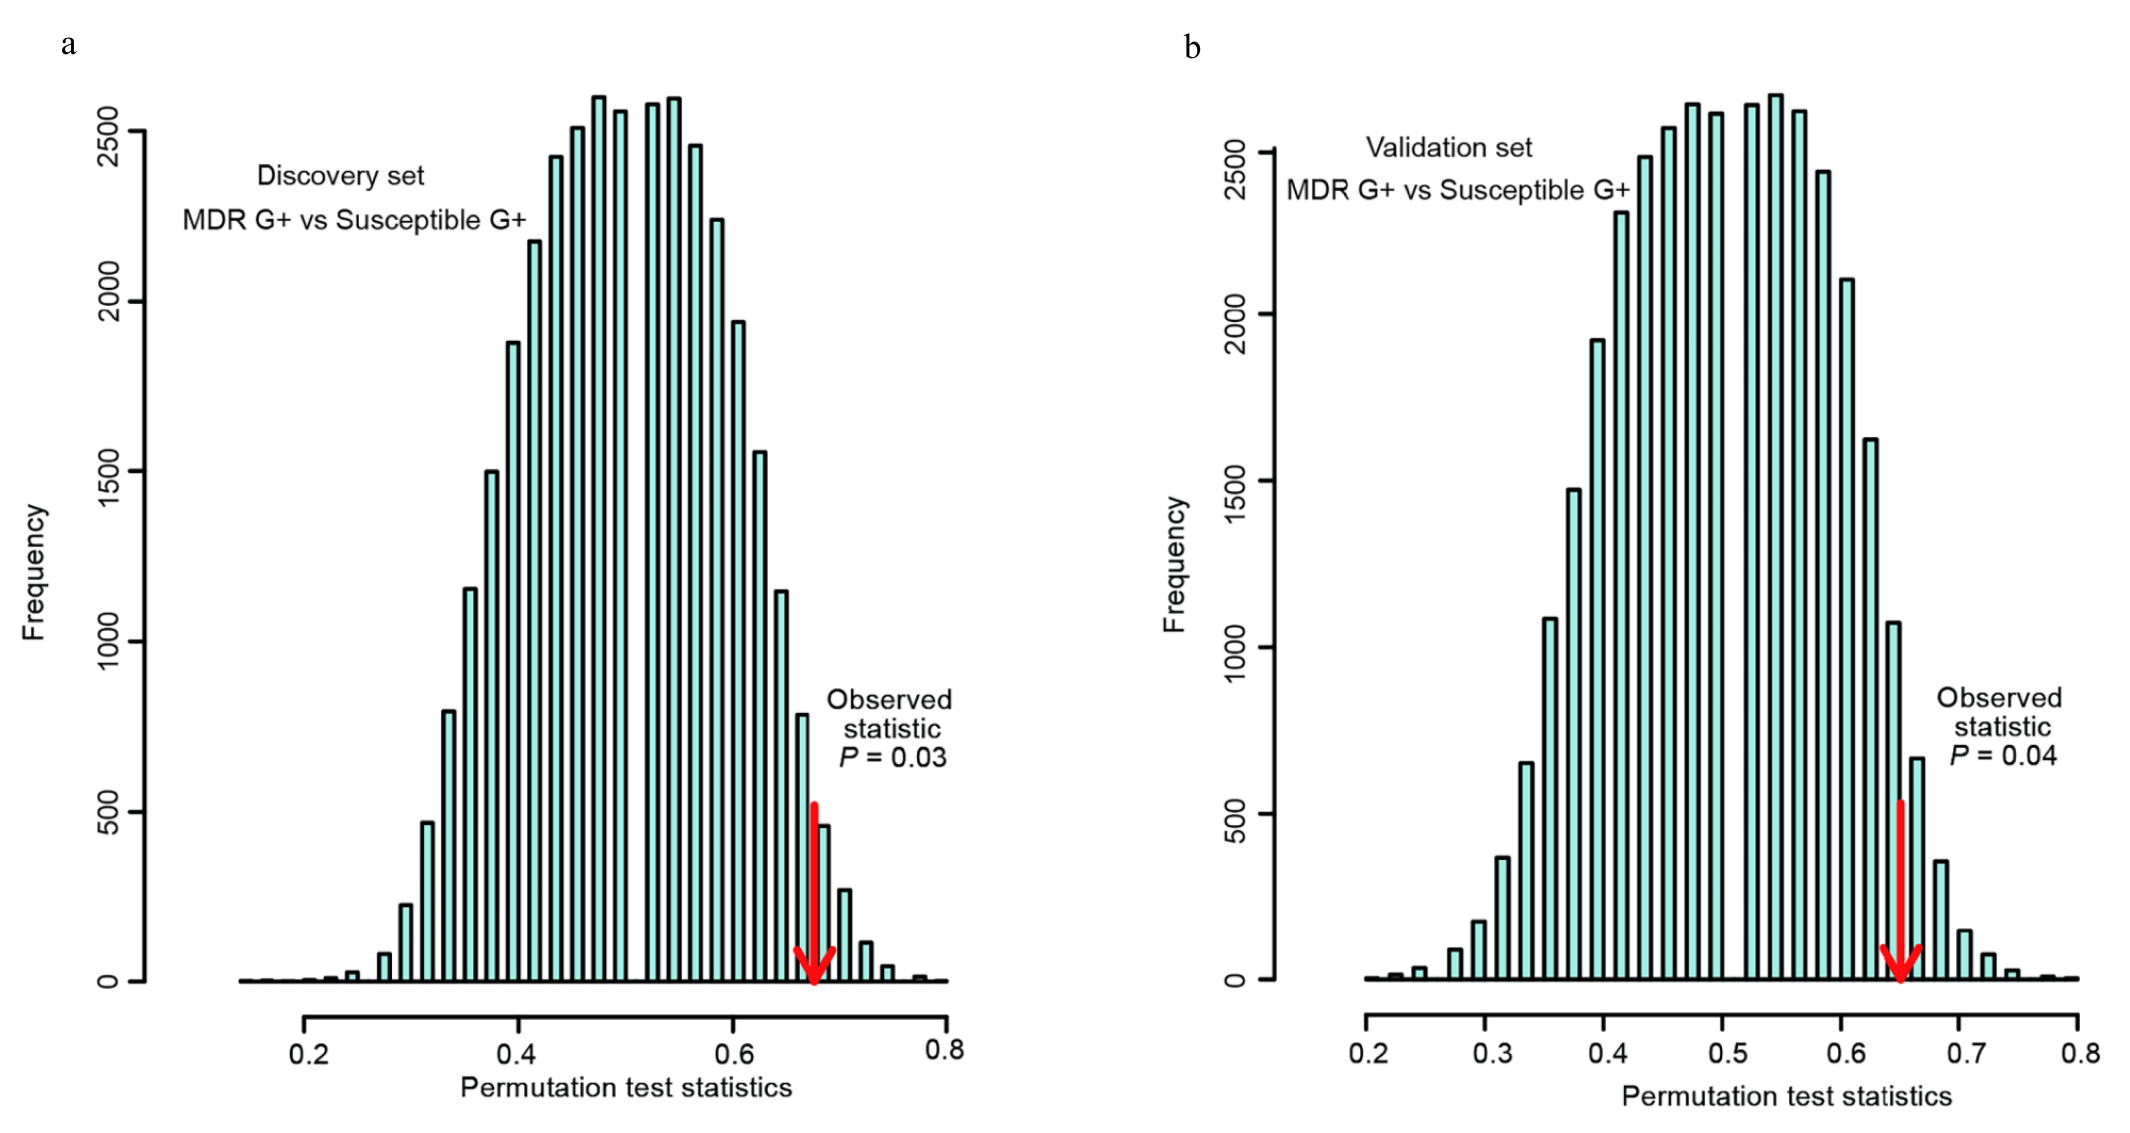


**Figure S7. The random permutation test result of the G- multi-analyte model of discovery and validation sets.** (a) Discovery set. (b) Validation set.
